# Supplementary material
Source: PubMed Central journal article supplement (PMC3916652)
Supplement: supp_M113.032292_mcp.M113.032292-1.pdf [file supp_M113.032292_mcp.M113.032292-1.pdf]

# **Quantitative phosphoproteomics reveals the role of protein arginine phosphorylation in the bacterial stress response**

Andreas Schmidt<sup>a</sup>, Débora Broch Trentini<sup>a</sup>, Silvia Spiess, Jakob Fuhrmann, Gustav Ammerer, Karl Mechtler, Tim Clausen

## **Supplemental Information**

### **Table of contents**

|                                                                              |          |
|------------------------------------------------------------------------------|----------|
| Supplemental legends to Tables 1, 4 and 5 (attached in separate excel files) | <b>2</b> |
| Supplemental Table 2                                                         | <b>4</b> |
| Supplemental Table 3                                                         | <b>5</b> |
| Supplemental Table 6                                                         | <b>6</b> |

## SUPPLEMENTAL LEGENDS:

### **Supplemental Table 1: Arginine-phosphorylated peptides identified in *B. subtilis* $\Delta ywIE$**

The attached Supplemental Table 1 (in Excel format) depicts all identified arginine-phosphorylated peptides identified in the iTRAQ study of *B. subtilis*  $\Delta ywIE$ , grouped in accordance to functional class. Identification scores were obtained from the database search using the MASCOT algorithm and an identification score above 16 was determined to give a false positive rate of < 1% on the PSM level. The phosphoRS site probability determines the likeliness of phosphorylation at the residue determined by the search algorithm. Individual site probabilities for each putative phospho-acceptor site in the identified peptide are provided in the respective column. Relative protein and peptide abundance ratios were determined from the area of the iTRAQ reporter ions in the corresponding HCD-MS/MS spectra. All phosphopeptide ratios were divided by the respective protein abundance ratios (listed in Table S5). Thereby, upregulation of the identified phosphorylations, independently of protein abundance changes, can be determined. Page two of this table contains the original peptide abundance ratios before normalization to the protein abundance as well as more identification details such as precursor mass accuracy. Identified Ser, Thr and Tyr phosphorylations are shown in page three of Supplemental Table 1.

**Supplemental Table 4: GO terms of arginine phosphorylated proteins at an FDR cutoff of 5%**

The proteins identified with phosphoarginine modification were subjected to GO term enrichment analysis using the Blast2GO software. The attached Supplemental Table 4 (in Excel format) lists the associated over- or underrepresented GO terms at a FDR of 5%.

**Supplemental Table 5: Protein abundances upon heat shock or oxidative stress relative to non-stressed *B. subtilis* cells**

The attached Supplemental Table 5 lists relative protein abundances upon heat shock or oxidative stress for all identified proteins in SCX experiment and in the phosphoproteomic samples were calculated from respective unphosphorylated peptides at an FDR rate of <1% for peptide identification. Those abundances were used to normalize the phosphorylation site abundance on the protein abundance in Supplemental Table 1.

## Supplemental Table 2: Protein phosphorylations in *B. subtilis* wild type strain

### Protein phosphorylation in wild type *B. subtilis* under non-stress conditions

| Gene name    | Protein                               |        |              |                                                          |
|--------------|---------------------------------------|--------|--------------|----------------------------------------------------------|
|              | Peptide sequence                      | P-Site | MASCOT score | Peptide site probability                                 |
| <b>rsbRB</b> | RsbT co-antagonist protein rsbRB      |        |              |                                                          |
|              | STALLPLVGIDITER                       | S186   | 36           | S(1): 0.0, T(2): 0.0, T(13): 100.0, R(15): 0.0           |
| <b>rsbV</b>  | Anti-sigma-B factor antagonist        |        |              |                                                          |
|              | DVSYMDSTGLGVFVGTFK                    | S56    | 41           | S(3): 0.0, Y(4): 0.0, S(7): 100.0, T(8): 0.0, T(16): 0.0 |
| <b>ytcl</b>  | Uncharacterized acyl--CoA ligase ytcl |        |              |                                                          |
|              | YLELLNRYK                             | S260   | 36           |                                                          |

### Supplemental Table 3: Protein phosphorylation in *B. subtilis* $\Delta mcsB\Delta ywle$

#### Protein phosphorylation in *B. subtilis* $\Delta mcsB/\Delta ywle$ under non-stress conditions

| Gene name    | Protein                          |        |              |                                                                                  |
|--------------|----------------------------------|--------|--------------|----------------------------------------------------------------------------------|
|              | Peptide sequence                 | P-Site | MASCOT score | Peptide site probability                                                         |
| <b>cotG</b>  | Spore coat protein G             |        |              |                                                                                  |
|              | GHYSHSDIEEAVKSAK                 | S15    | 69           | H(2): 0.0, Y(3): 0.0, S(4): 0.0, H(5): 0.0, S(6): 0.0, S(14): 100.0              |
| <b>cotB</b>  | Spore coat protein B             |        |              |                                                                                  |
|              | SPGYSSSIKSSGK                    | S355   | 67           | S(1): 0.0, Y(4): 0.0, S(5): 0.5, S(6): 0.5, S(7): 0.5, S(10): 97.9, S(11): 0.5   |
|              | SSGKQKEDYSYETIVR                 | S356   | 67           | S(1): 0.3, S(2): 99.7, Y(9): 0.0, S(10): 0.0, Y(11): 0.0, T(13): 0.0, R(16): 0.0 |
| <b>rsbRB</b> | RsbT co-antagonist protein rsbRB |        |              |                                                                                  |
|              | STALLPLVGIDITER                  | S186   | 58           | S(1): 0.0, T(2): 0.0, T(13): 100.0, R(15): 0.0                                   |

#### Protein phosphorylation in *B. subtilis* $\Delta mcsB/\Delta ywle$ upon heat shock

| Gene name    | Protein                               |                |              |                                                                                   |
|--------------|---------------------------------------|----------------|--------------|-----------------------------------------------------------------------------------|
|              | Peptide sequence                      | P-Site         | MASCOT score | Peptide site probability                                                          |
| <b>cotG</b>  | Spore coat protein G                  |                |              |                                                                                   |
|              | GHYSHSDIEEAVKSAK                      | S15            | 47           | H(2): 0.0, Y(3): 0.0, S(4): 0.0, H(5): 0.0, S(6): 0.0, S(14): 100.0               |
|              | GHYSHSDIEEAVKSAK                      | S15            | 28           | H(2): 0.0, Y(3): 0.0, S(4): 0.0, H(5): 0.0, S(6): 0.0, S(14): 100.0               |
| <b>cotB</b>  | Spore coat protein B                  |                |              |                                                                                   |
|              | SPGYSSSIKSSGK                         | S355           | 74           | S(1): 0.0, Y(4): 0.0, S(5): 0.0, S(6): 0.0, S(7): 0.0, S(10): 99.6, S(11): 0.4    |
|              | SSGKQKEDYSYETIVR                      | S356           | 46           | S(1): 50.0, S(2): 50.0, Y(9): 0.0, S(10): 0.0, Y(11): 0.0, T(13): 0.0, R(16): 0.0 |
| <b>rsbRB</b> | RsbT co-antagonist protein rsbRB      |                |              |                                                                                   |
|              | STALLPLVGIDITER                       | T186           | 60           | S(1): 0.0, T(2): 0.0, T(13): 100.0, R(15): 0.0                                    |
|              | STALLPLVGIDITERAK                     | T186           | 64           | S(1): 0.0, T(2): 0.0, T(13): 100.0, R(15): 0.0                                    |
| <b>rsbV</b>  | Anti-sigma-B factor antagonist        |                |              |                                                                                   |
|              | DVSYMDSTGLGVFVGTFK                    | S56            | 56           | S(3): 0.0, Y(4): 0.0, S(7): 98.8, T(8): 1.2, T(16): 0.0                           |
| <b>ywqD</b>  | Tyrosine-protein kinase ywqD          |                |              |                                                                                   |
|              | HSEYGYGTDKNFMQK                       | Y228           | 45           | H(1): 0.0, S(2): 0.0, Y(4): 0.0, Y(6): 0.0, Y(7): 94.9, T(9): 5.1                 |
| <b>atpA</b>  | ATP synthase subunit alpha            |                |              |                                                                                   |
|              | SIKAEIISTLIK                          | S1             | 50           | S(1): 100.0, S(8): 0.0, T(9): 0.0                                                 |
| <b>ycbU</b>  | Uncharacterized aminotransferase ycbU |                |              |                                                                                   |
|              | ASETAGLLKKK                           | S323<br>orT325 | 29           | S(2): 50.0, T(4): 50.0                                                            |
| <b>yvyG</b>  | Uncharacterized protein yvyG          |                |              |                                                                                   |
|              | YIQAITQTEDDRIK                        | Y49            | 60           | Y(1): 100.0, T(6): 0.0, T(8): 0.0, R(12): 0.0                                     |

**Supplemental Table 6: Phosphopeptides identified in *B. subtilis* wild type submitted to YwIE inhibition with pervanadate and subsequent heat shock**

Supplemental Table 6 shows identified arginine-phosphorylated peptides of a *B. subtilis* wild type cell lysate upon irreversible inhibition of YwIE activity by the cell membrane-permeable phosphatase inhibitor sodium pervanadate. Five minutes after adding the inhibitor (final concentration 400  $\mu$ M), cells were exposed to heat shock at 50 °C and phosphosites were determined by LC-MS/MS without iTRAQ quantification. The corresponding unstressed sample did not yield arginine phosphorylations.

| Gene name                         | Peptide sequence            | pArg site | pArg identified in <i>B. subtilis</i> $\Delta$ ywIE | MASCOT score | phosphoRS score | phosphoRS probability |
|-----------------------------------|-----------------------------|-----------|-----------------------------------------------------|--------------|-----------------|-----------------------|
| <b>Protein Quality Control</b>    |                             |           |                                                     |              |                 |                       |
| clpC                              | EVESLIGRGQEMSQTIHYTPR       | R70       | Yes                                                 | 53           | 61.2            | 0.980                 |
|                                   | EVESLIGRGQEMSQTIHYTPR (MSO) | R70       | Yes                                                 | 34           | 134.4           | 0.999                 |
| groEL                             | GRNVVLEK                    | R35       | Yes                                                 | 28           | 3.5             | 1.000                 |
| <b>Transcriptional Regulation</b> |                             |           |                                                     |              |                 |                       |
| ctsR                              | FTSERGYIVESK                | R55       | Yes                                                 | 31           | 117.9           | 0.988                 |
| hrcA                              | SAQPVGSRTLK                 | R7        | No                                                  | 53           | 139.1           | 0.498                 |
|                                   | THSSSGRTVPSEK               | R64       | Yes                                                 | 28           | 24.7            | 0.746                 |
| <b>Ribosome</b>                   |                             |           |                                                     |              |                 |                       |
| rpIN                              | MIQQETRLK                   | R7        | Yes                                                 | 28           | 158.2           | 0.996                 |
|                                   | MIQQETRLK (MSO)             | R7        | Yes                                                 | 22           | 83.6            | 0.935                 |
| rpmGA                             | NNPDRVEFK                   | R29       | Yes                                                 | 34           | 162.0           | 1.000                 |
|                                   | NNPDRVEFKK                  | R29       | Yes                                                 | 32           | n.a.            | n.a.                  |
| rpsH                              | IRNANMVR                    | R15       | No                                                  | 27           | 115.2           | 1.000                 |
|                                   | YGQNNERVITGLK               | R72       | No                                                  | 55           | 158.0           | 0.995                 |
| rpIQ                              | AKELRSVVEK                  | R41       | No                                                  | 65           | 217.0           | 1.000                 |
| tufA                              | GTVATGRVER                  | R232      | Yes                                                 | 36           | 35.2            | 0.786                 |
| <b>Other Proteins</b>             |                             |           |                                                     |              |                 |                       |
| gudB                              | AADRNTGHTTEEDKLDVLK         | R5        | Yes                                                 | 42           | 323.2           | 0.989                 |
|                                   | IFTGYRAQHNSVGPVK            | R69       | Yes                                                 | 57           | n.a.            | n.a.                  |
|                                   | GGIRFHPNVTEK                | R84       | Yes                                                 | 39           | 184.3           | 0.5                   |
| odhA                              | LTGQDSERGTFAQR              | R624      | Yes                                                 | 52           | 132.2           | 0.926                 |
| rbsA                              | TASPETHARHLGGNQK            | R392      | Yes                                                 | 42           | n.a.            | n.a.                  |
| ahpC                              | AAQYVRQNPGEVCPAK            | R159      | No                                                  | 39           | 201.0           | 1.000                 |
